# Considering Going Deep with TMS for Your Practice? Here is Why You Should Choose MagVenture®

Are you a mental health professional who is considering TMS treatment options for your Practice? MagVenture provides proven solutions to treat major depressive disorder as well as OCD, solutions that help practitioners improve patients' lives and benefit their practice as well. You have choices when it comes to TMS systems. So why choose us?

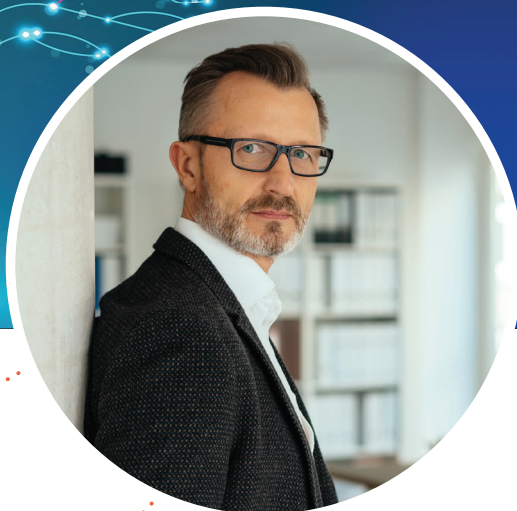

## Ease of Use.

Switch coils easily and quickly, with no tools.

## Value.

No "pay-per-use" fees and low cost of operation. Start to recoup your investment immediately.

## Specificity.

MagVenture systems exhibit a 6.4-fold lower seizure rate compared to systems with helmet-style coils.<sup>3</sup>

## Reputation and Efficacy.

More of our machines are installed globally than any other manufacturer. The foremost TMS experts and researchers use MagVenture systems.

## Support.

We have teams in three US locations to support you.

## Flexibility.

The MV system is modular and grows with you. Our liquid-cooled coils allow you to treat patients back-to-back all day long.

## Patient Satisfaction.

Our systems are quiet<sup>1</sup>, comfortable<sup>2</sup>, and less confining for the patient.

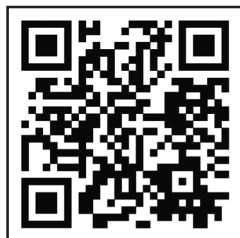

Find out what hundreds of practitioners already know about the benefits of working with MagVenture. Contact us today and let's talk about how we can help you get your patients well while providing value for your practice on day 1. **Go deep with MagVenture.**

MagVenture.com

**MagVenture** TMS Therapy  
Stimulating mental health.

1. S.C. Dhamne et al., *Brain Stimulation* (2014); 7(3): 432-434  
2. A.V. Peterchev et al. *Brain Stimulation* (2017); 10(1): 99-105  
3. J.J. Taylor, et al., *Brain Stimulation* 14 (2021) 965e973

PERMANENTE MEDICINE®

## Why work at Kaiser Permanente?

- Market-leading benefits
- Flexibility for a work/life balance
- Physician-led, physician-friendly environment
- No RVUs
- Practice medicine in a culture that is collaborative, inclusive, and supported by technology

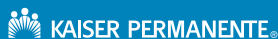

permanente.org

If you believe that Psychiatry is not only a career, but your calling, then you belong with us.

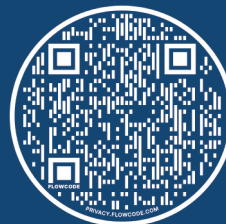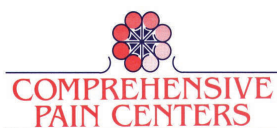

### PAIN PSYCHIATRY FELLOWSHIP OPPORTUNITY

Comprehensive Pain Centers offers a one-year non-accredited multi-disciplinary fellowship opportunity in Pain Medicine.

The fellowship integrates the core competencies of pain medicine including interventional and chronic pain management, general musculoskeletal care, pain pharmacology and addiction medicine.

During the fellowship year, the trainee will learn and perform thorough assessments of patients in chronic pain, develop and implement treatment plans using clinical and scientific data and patient preference. Effectively communicate diagnoses and treatment plans to patients in an outpatient setting. Competently perform all medical and invasive procedures considered essential for managing pain which include, but are not limited to cervical, thoracic and lumbar spinal interventions under fluoroscopy including epidural injections, targeted facet blocks, sympathetic nerve blocks, spinal cord stimulator implants, spinal drug delivery pain implants, neurolytic techniques such as radiofrequency ablation, regenerative medicine, Transcranial magnetic stimulation (TMS), and proficient in medication management.

Submit resume to: [info@comprehensivepain.com](mailto:info@comprehensivepain.com) for consideration.

1146 S. CEDAR CREST BLVD., ALLENTOWN PA 18103  
[www.comprehensivepain.com](http://www.comprehensivepain.com)

PSYCHIATRIC  
NEWS

BRIEF

## Enable Psychiatric News Brief

With the American Psychiatric Association's new flash briefing, *Psychiatric News Brief*, you can now listen to synopses of curated articles from *Psychiatric News*. Simply enable this skill and you can listen anytime you choose throughout your day by just saying "Alexa, what's my flash briefing" or "Alexa, tell me what's new".

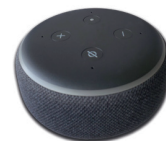

Flash briefing is a customizable Amazon skill that includes updates from your favorite content services. When you say, "Alexa, what's my flash briefing?" or "Alexa, what's the news," you'll hear updates from any organization that you have enabled.

Go to [psychnews.psychiatryonline.org/alexa](http://psychnews.psychiatryonline.org/alexa) to sign up now!

AMERICAN  
PSYCHIATRIC  
ASSOCIATION  
PUBLISHING

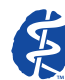

[www.appi.org](http://www.appi.org)  
Email: [appi@psych.org](mailto:appi@psych.org)  
Phone: 1-800-368-5777

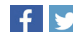

# PSYCHIATRYonline

Your Destination for Lifelong Learning in Psychiatry

The one-stop resource for information on diagnosis, treatment, guidelines, the latest research, and breaking news from the field.

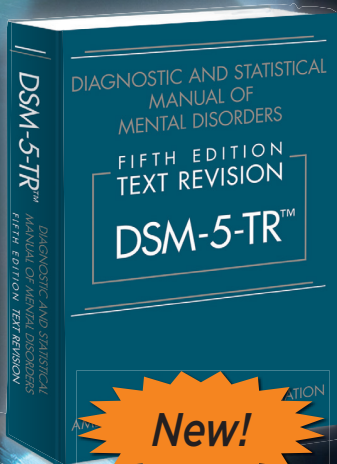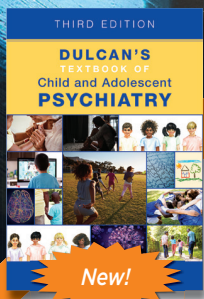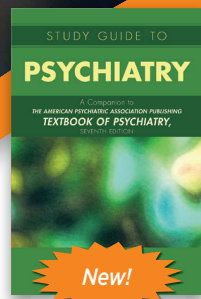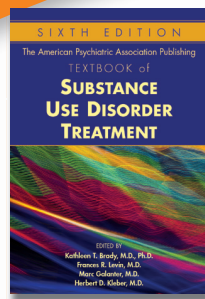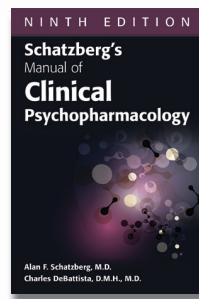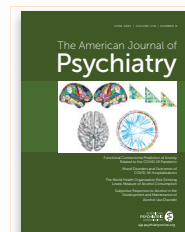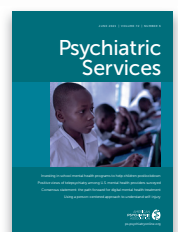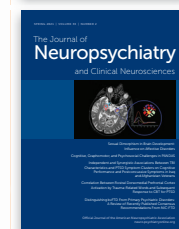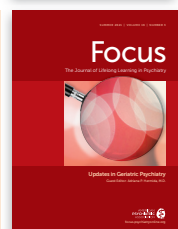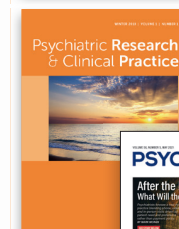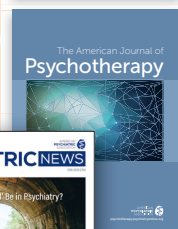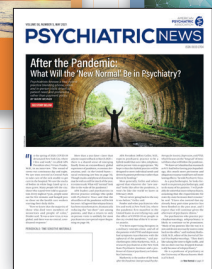

**PsychiatryOnline.org** is the platform for all American Psychiatric Association Publishing journals, *DSM-5-TR™*, and bestselling textbooks, as well as APA Practice Guidelines, and continuing medical education.

This is a one-stop resource for information on psychiatric diagnosis, treatment, guidelines, the latest research, and breaking news from the field. From a single location, users can search across all books and journals to find the most relevant content easier than ever.

Subscribe to products individually or to the DSM Select package that includes the DSM-5® library, books and select journals.

**Go to [www.appi.org](http://www.appi.org) to subscribe.**

*Institutional subscription options are available.*

*For more information contact: [institutions@psych.org](mailto:institutions@psych.org);  
800-368-5777 ext. 3729*
