# The American Journal of Psychiatry

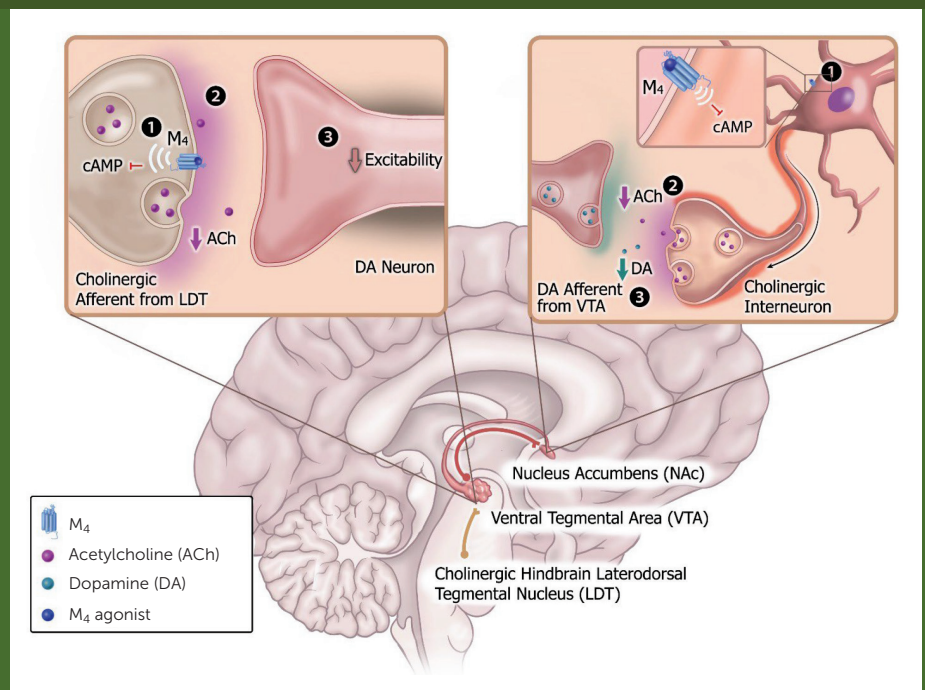

Muscarinic Acetylcholine Receptor Agonists as Novel  
Treatments for Schizophrenia

Schizophrenia Imaging Signatures and Their Associations  
With Cognition, Psychopathology, and Genetics  
in the General Population

Persistent Dissociation and Its Neural Correlates in  
Predicting Outcomes After Trauma Exposure

Decoding Shared Versus Divergent Transcriptomic  
Signatures Across Cortico-Amygdala Circuitry  
in PTSD and Depressive Disorders
